# Supplementary material for: 2D/2D Mo2CTx/g-C3N4 with a strong coupling interface via one-step NH4Cl-assisted calcination for enhanced photocatalytic hydrogen production
Source: Royal Society of Chemistry journal article supplement (doi:10.1039/d4cy00882k), 2024-01-01
Supplement: d4cy00882k1.pdf [file d4cy00882k1.pdf]

## Supporting Information

### **2D/2D Mo<sub>2</sub>CT<sub>x</sub>/g-C<sub>3</sub>N<sub>4</sub> with a strong coupling interface via one-step NH<sub>4</sub>Cl-assisted calcination for enhanced photocatalytic hydrogen production**

Haiting Zou<sup>a</sup>, Miaomiao Pan<sup>a</sup>, Ping Wang<sup>a,\*</sup>, Xuefei Wang<sup>a</sup>, Feng Chen<sup>a</sup>,

Huogen Yu<sup>a,b,\*</sup>

<sup>a</sup>School of Chemistry, Chemical Engineering and Life Sciences, Wuhan University of Technology, Wuhan 430070, PR China

<sup>b</sup>Laboratory of Solar Fuel, Faculty of Materials Science and Chemistry, China University of Geosciences, Wuhan, 430074, PR China

\*Corresponding authors. Tel: +86(27)87749379;

E-mail: wangping0904@whut.edu.cn (Ping Wang);

huogenyu@163.com (Huogen Yu)

## **SI Experimental**

### **SI-1 Materials**

Mo<sub>2</sub>Ga<sub>2</sub>C, guanidine hydrochloride (CH<sub>6</sub>CIN<sub>3</sub>), ammonium chloride (NH<sub>4</sub>Cl), ammonium fluoride (NH<sub>4</sub>F), hydrochloric acid (HCl), lactic acid (CH<sub>3</sub>CH(OH)COOH) and sodium sulfide (Na<sub>2</sub>SO<sub>4</sub>) are used as analytical fluids.

### **SI-2 Characterization**

XRD patterns of photocatalysts were recorded using a rotation anode high-power X-ray diffractometer (Rigaku K $\alpha$  III). The Fourier transform infrared (FTIR) spectra were recorded on a spectrometer (Nicolet6700). The SEM and TEM results were revealed by JSM-7500F and FEI Talos F200S, respectively. UV–vis spectra were obtained by a UV-2450 spectrophotometer. The surface chemical composition was analyzed on a scanning X-ray microprobe (ESCALAB 250Xi).

### **SI-3 Photocatalytic H<sub>2</sub> production activity measurement**

To test the photocatalytic performance, 50 mg of the synthesized photocatalyst was dispersed into 80 mL of lactic acid aqueous and stirred for 30 minutes. Then the air in the three-neck flask was drained by degassing with nitrogen for 15 minutes. Subsequently irradiated by an LED lamp (3-W, 420 nm, Shenzhen, China). Then 40  $\mu$ L gas was taken every 30 minutes by syringe to the gas chromatograph for testing (GC-2014C, Shimadzu Corporation). Herein, the gas chromatograph uses a TCD detector and 5 A molecular sieve column, with N<sub>2</sub> as the carrier gas. A photocatalytic H<sub>2</sub> production test is completed within 2 hours. After finishing 1st run, the above suspension (without filtration, washing, and drying) was re-bubbled with N<sub>2</sub> for 30 min

to remove the generated H<sub>2</sub> and was reused for the next H<sub>2</sub>-evolution test. Subsequently, the 2nd, 3rd, and 4th runs were coherently tested under the same process.

The apparent quantum efficiency (AQE) of Mo<sub>2</sub>CT<sub>x</sub>/g-C<sub>3</sub>N<sub>4</sub> and Mo<sub>2</sub>CT<sub>x</sub>-g-C<sub>3</sub>N<sub>4</sub> photocatalysts is calculated via the following equation:

$$\begin{aligned} \text{AQE}(\%) &= \frac{\text{number of reacted electrons}}{\text{number of incident photons}} \times 100 \\ &= \frac{\text{number of evolved H}_2 \text{ molecules} \times 2}{\text{number of incident photons}} \times 100 \end{aligned} \quad (\text{S1})$$

The average power of the UV-light (four 3-W 420 nm) was 50 mW/cm<sup>2</sup>.

#### **SI-4 Photoelectrochemical measurements**

Electrochemical analyzer (CHI 660 E, China) was used to test the photoelectric chemical curve (PEC) of the sample. The synthesized sample was used as the working electrode, the standard Ag/AgCl electrode as the reference electrode, and the Pt electrode was used to make a three-electrode device. The working electrodes were prepared on FTO conductive glass. First, 10 mg sample was dispersed in 2.5 ml ethanol solution and ultrasonic for 15 minutes to form a dispersion solution. Second, 0.5 ml dispersed droplets were added to 0.5 ml Nafion-ethanol mixed solution (the ratio of ethanol to Nafion membrane solution was 4:1), and ultrasound was continued for 15 minutes. Third, 30 μL dispersion was removed and added to the FTO conductive glass and rotated for 15 s at a rotational speed of 700 r min<sup>-1</sup>, repeated 10 times. Last, FTO conductive glass with uniformly loaded sample was placed in the oven to dry. Linear sweep voltammetry (LSV) curves were obtained in the potential range of -1.0 to -1.6 V at a sweep rate of 10 mV s<sup>-1</sup>. Transient photocurrent responses with time (i-t curve) were recorded during the periodic ON/OFF lighting cycle under a 3-W LED lamp (420

nm) and 0.5 V bias, and the electrochemical impedance spectroscopy (EIS) tests were performed at an open circuit voltage, at the frequency range of 0.01-105 hz with an ac amplitude of 10 mV under the open-circuit voltage.

### SI-5. Density functional theory calculation

The calculations were carried out by utilizing Vienna Ab-initio simulation package (VASP) [1-3]. The exchange-correlation effects were revealed by generalized gradient approximation (GGA) and Perdewy-Burke-Ernzerhof(PBE) functional. The g-C<sub>3</sub>N<sub>4</sub> (002) structure was built with 16 N atoms and 12 C atoms. The Mo<sub>2</sub>CT<sub>x</sub> model was constructed by removing Ga atoms from the Mo<sub>2</sub>Ga<sub>2</sub>C (001) model and constructing a (3×3×1) supercell containing 36 Mo atoms and 18 C atoms (adding 15 Å vacuum). The cutoff energy and Monkhorst-Pack k-point mesh were set as 450 eV and 3 × 3 × 1, respectively. The convergence threshold for total energy converged within 10<sup>-5</sup> eV/atom and 0.01 eV·Å<sup>-1</sup> for force. The partial occupancies were determined using the Gaussian smearing scheme with a smearing width of 0.2 eV. To eliminate interactions between periodic structures, a vacuum of 15 Å was added. The Gibbs free energy of H atom adsorption ( $\Delta G_{H^*}$ ) was defined as following the equation S2:

$$\Delta G_{H^*} = \Delta E_{H^*} + \Delta E_{ZPE} - T\Delta S_H \quad (S2)$$

where  $\Delta E_{H^*}$ ,  $\Delta E_{ZPE}$ , and  $T\Delta S_H$  are the differential hydrogen  $\Delta E_{H^*}$  adsorption energy, the change in zero-point energy and entropy between the adsorbed hydrogen and molecular hydrogen in the gas phase, respectively, and  $T$  is the temperature. By default the entropy of H<sub>2</sub> gas at 298 K is 130 J·mol<sup>-1</sup>·K<sup>-1</sup>, so the term  $T\Delta S_H$  was calculated to be -0.20 eV.

## References

1. H. Long, P. Wang, X. Wang, F. Chen, H. Yu, *Appl. Sur. Sci.* 2022, **604**, 154457.
2. D. Gao, H. Long, X. Wang, J. Yu, H. Yu, *Adv. Funct. Mater.*, 2022, **34**, 210847.
3. W. Zhong, B. Zhao, X. Wang, P. Wang, H. Yu, *ACS Catal.*, 2023, **13**, 749-756.

## Figure captions

**Fig. S1.** FESEM images and AFM of  $\text{Mo}_2\text{CT}_x$  (A, B) and  $\text{Mo}_2\text{CT}_x(\text{NH}_4\text{Cl})$  (C, D).

**Fig. S2.** The photocatalytic  $\text{H}_2$ -evolution activity of  $\text{Mo}_2\text{CT}_x/\text{g-C}_3\text{N}_4$  (A) at different pH values in ethanol solution (25 vol%) and (B) in lactic acid (10 vol%, pH = ca. 3), ethanol (25 vol%, pH = ca. 7), and TEOA (10 vol%, pH = ca. 9) solution.

**Fig. S3.** (A) The XRD patterns and (B) UV-vis spectra of  $\text{Mo}_2\text{CT}_x/\text{g-C}_3\text{N}_4$  before (a) and after (b) irradiation.

**Fig. S4.** XPS survey spectra of  $\text{g-C}_3\text{N}_4$ ,  $\text{Mo}_2\text{CT}_x\text{-g-C}_3\text{N}_4$ , and  $\text{Mo}_2\text{CT}_x/\text{g-C}_3\text{N}_4$ .

**Table S1.** Raw material ratios (the yield of g-C<sub>3</sub>N<sub>4</sub> from CH<sub>6</sub>CIN<sub>3</sub> is approximately 26%).

| Sample                                                                 | NH <sub>4</sub> Cl (g) | CH <sub>6</sub> CIN <sub>3</sub> (g) | Mo <sub>2</sub> CT <sub>x</sub> (mg) |
|------------------------------------------------------------------------|------------------------|--------------------------------------|--------------------------------------|
| g-C <sub>3</sub> N <sub>4</sub>                                        | 2                      | 1                                    | -                                    |
| Mo <sub>2</sub> CT <sub>x</sub> /g-C <sub>3</sub> N <sub>4</sub> (3%)  | 2                      | 1                                    | 7.8                                  |
| Mo <sub>2</sub> CT <sub>x</sub> /g-C <sub>3</sub> N <sub>4</sub> (10%) | 2                      | 1                                    | 26                                   |
| Mo <sub>2</sub> CT <sub>x</sub> /g-C <sub>3</sub> N <sub>4</sub> (15%) | 2                      | 1                                    | 39                                   |
| Mo <sub>2</sub> CT <sub>x</sub> /g-C <sub>3</sub> N <sub>4</sub> (20%) | 2                      | 1                                    | 52                                   |

**Table S2.** The H<sub>2</sub>-evolution performance and apparent quantum efficiency (AQE) of various samples.

| Sample                                                                 | H <sub>2</sub> -production activity ( $\mu\text{mol h}^{-1} \text{g}^{-1}$ ) | AQE (%) |
|------------------------------------------------------------------------|------------------------------------------------------------------------------|---------|
| g-C <sub>3</sub> N <sub>4</sub>                                        | 5                                                                            | 0.16    |
| Mo <sub>2</sub> CT <sub>x</sub> /g-C <sub>3</sub> N <sub>4</sub> (3%)  | 48                                                                           | 1.49    |
| Mo <sub>2</sub> CT <sub>x</sub> /g-C <sub>3</sub> N <sub>4</sub> (10%) | 96                                                                           | 2.98    |
| Mo <sub>2</sub> CT <sub>x</sub> /g-C <sub>3</sub> N <sub>4</sub> (15%) | 125                                                                          | 3.88    |
| Mo <sub>2</sub> CT <sub>x</sub> /g-C <sub>3</sub> N <sub>4</sub> (20%) | 76                                                                           | 2.36    |
| Mo <sub>2</sub> CT <sub>x</sub> -g-C <sub>3</sub> N <sub>4</sub> (15%) | 7                                                                            | 0.22    |



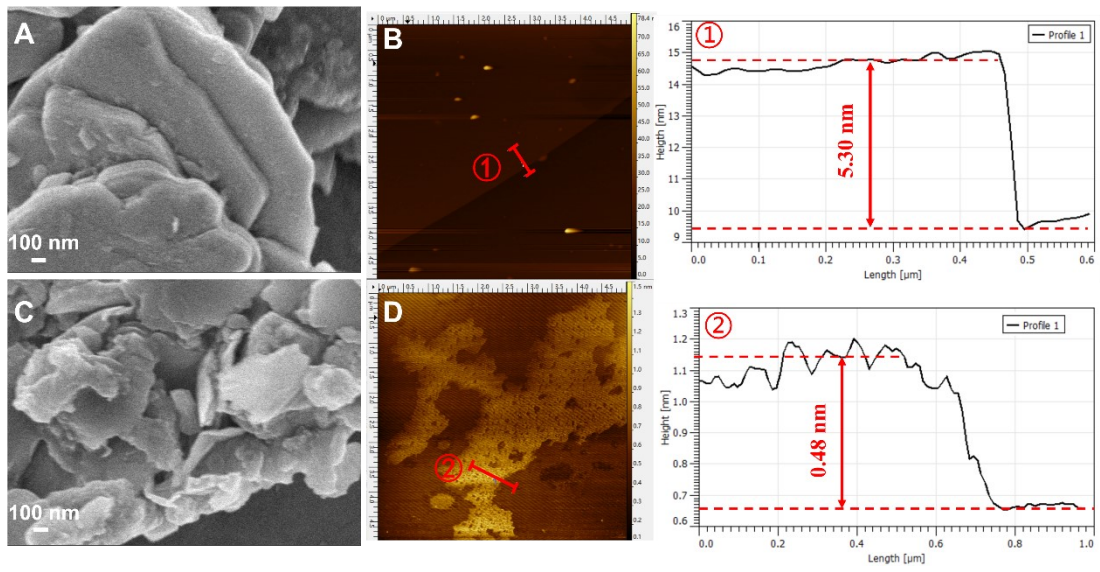

**Fig. S1.** FESEM images and AFM of  $\text{Mo}_2\text{CT}_x$  (A, B) and  $\text{Mo}_2\text{CT}_x(\text{NH}_4\text{Cl})$  (C, D)

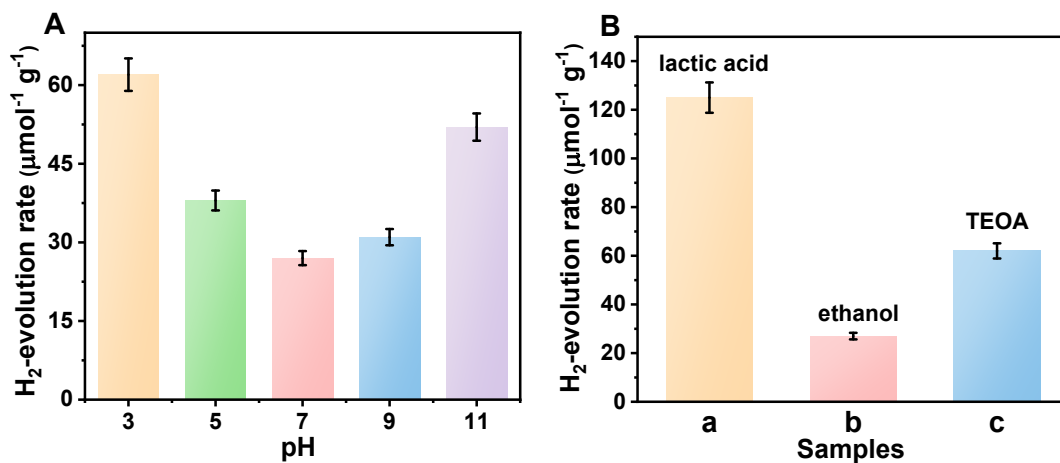

**Fig. S2.** The photocatalytic H<sub>2</sub>-evolution activity of Mo<sub>2</sub>CT<sub>x</sub>/g-C<sub>3</sub>N<sub>4</sub> (A) at different pH values in ethanol solution (25 vol%) and (B) in lactic acid (10 vol%, pH = ca. 3), ethanol (25 vol%, pH = ca. 7), and TEOA (10 vol%, pH = ca. 9) solution.

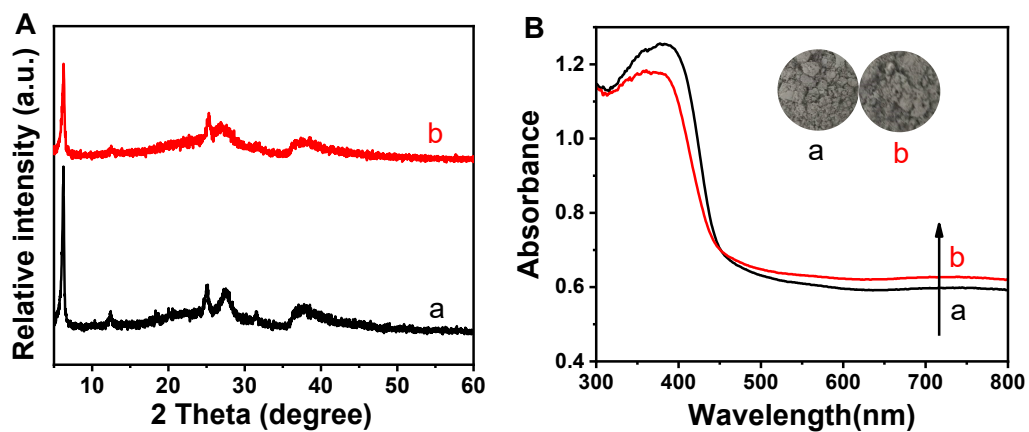

**Fig. S3.** (A) XRD patterns and (B) UV-vis spectra of  $\text{Mo}_2\text{CT}_x/\text{g-C}_3\text{N}_4(15\%)$  before (a) and after (b) irradiation.

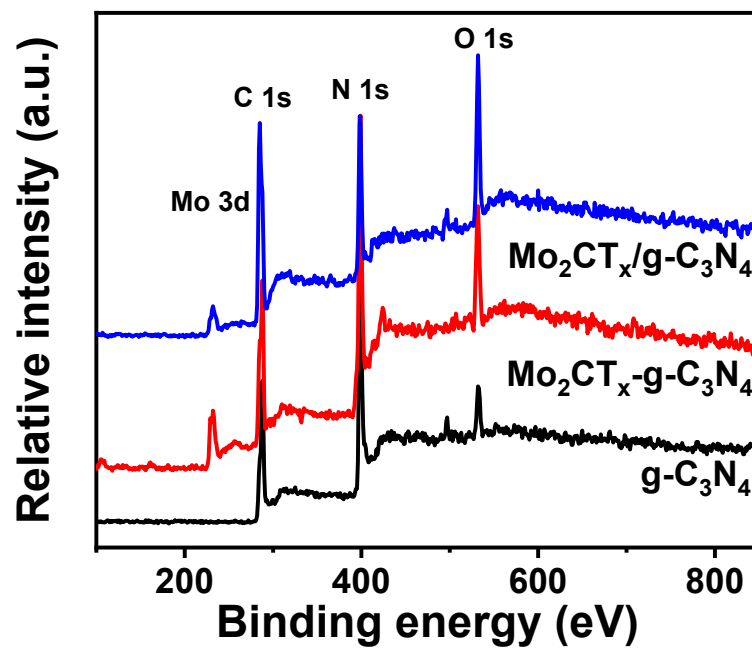

**Fig. S4.** XPS survey spectra of  $\text{g-C}_3\text{N}_4$ ,  $\text{Mo}_2\text{CT}_x\text{-g-C}_3\text{N}_4$ , and  $\text{Mo}_2\text{CT}_x/\text{g-C}_3\text{N}_4$ .
